# Supplementary material for: An Eu3+-functionalized metal–organic framework (Eu@Zn-MOF) for the highly sensitive detection of rotenone in serum
Source: Royal Society of Chemistry journal article supplement (doi:10.1039/d2nj03640a), 2022-01-01
Supplement: d2nj03640a1.pdf [file d2nj03640a1.pdf]

## Supporting Information

### **An Eu<sup>3+</sup>-functionalized metal-organic framework (Eu@Zn-MOF) using for highly sensitive detection of rotenone in serum**

Yingmin Jin<sup>+</sup>, Xin Xu<sup>+</sup>, Wanpeng Ma, and Bing Yan\*

School of Chemical Science and Engineering, Tongji University, Siping Road 1239, Shanghai 200092, China.

[+] These authors contributed equally to this work.

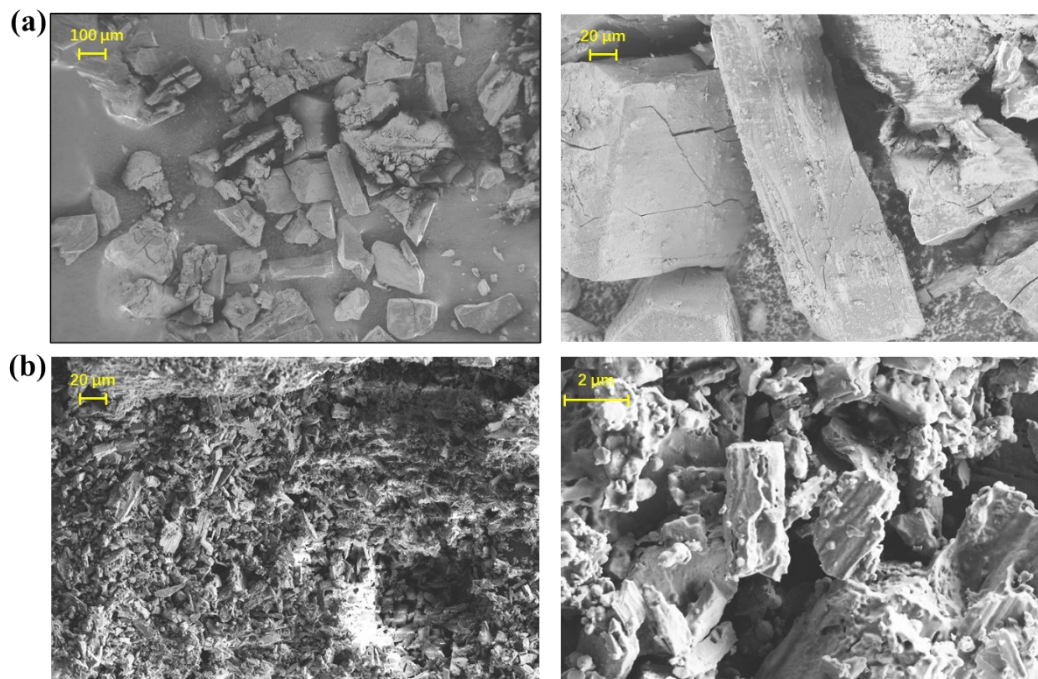

**Fig. S1** The SEM images of (a) Zn-MOF (b) Eu@Zn-MOF.

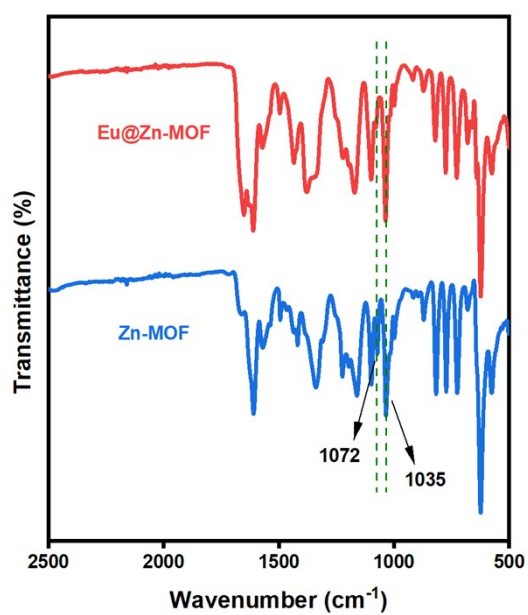

**Fig. S2** The FTIR spectra of Zn-MOF and Eu@Zn-MOF.

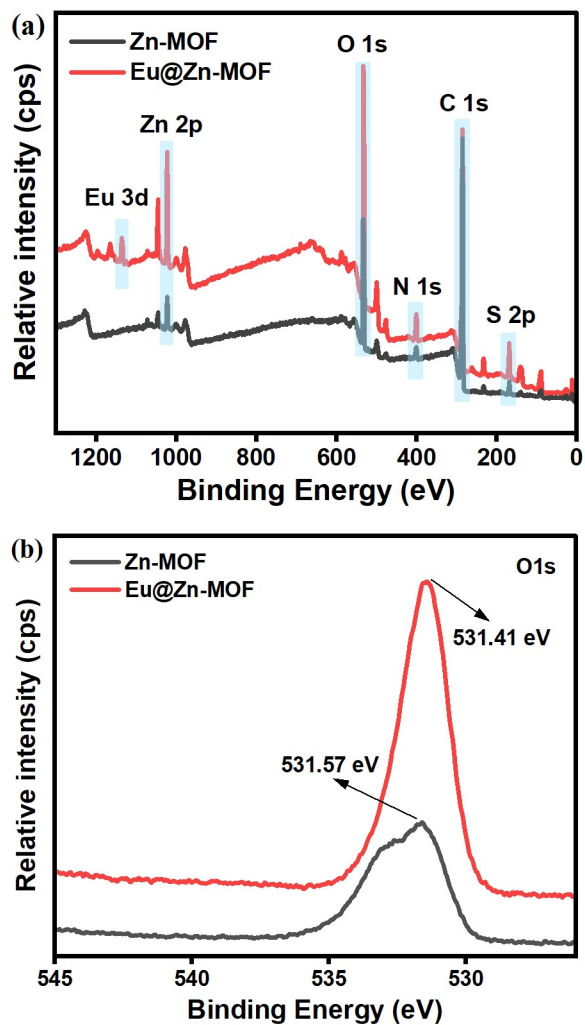

**Fig. S3** (a) The full XPS spectra (b) O 1s XPS patterns of solid-state Zn-MOF and Eu@Zn-MOF.

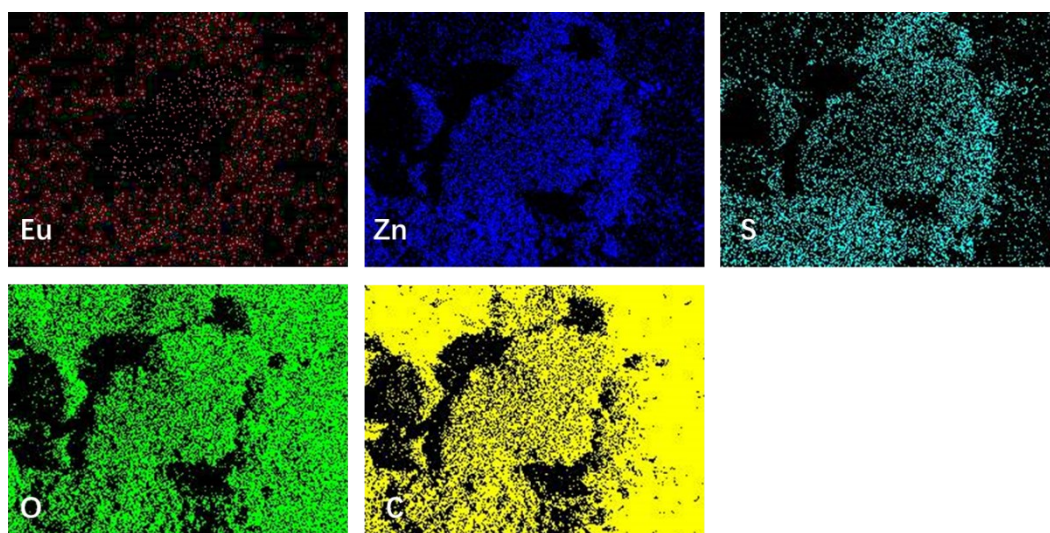

**Fig. S4** The EDS mapping images of the solid Eu@Zn-MOF powder sample.

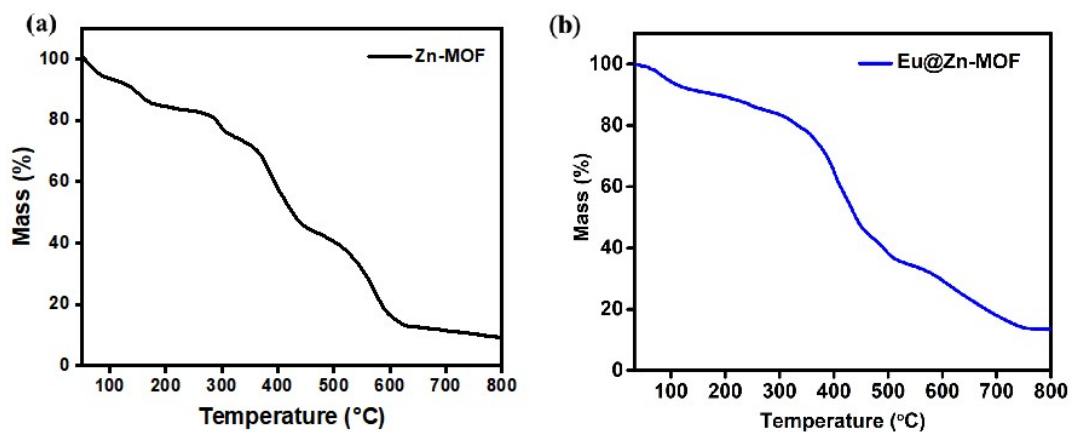

**Fig. S5** The thermal gravimetric analysis (TGA) curve of (a) Zn-MOF (b) Eu@Zn-MOF.

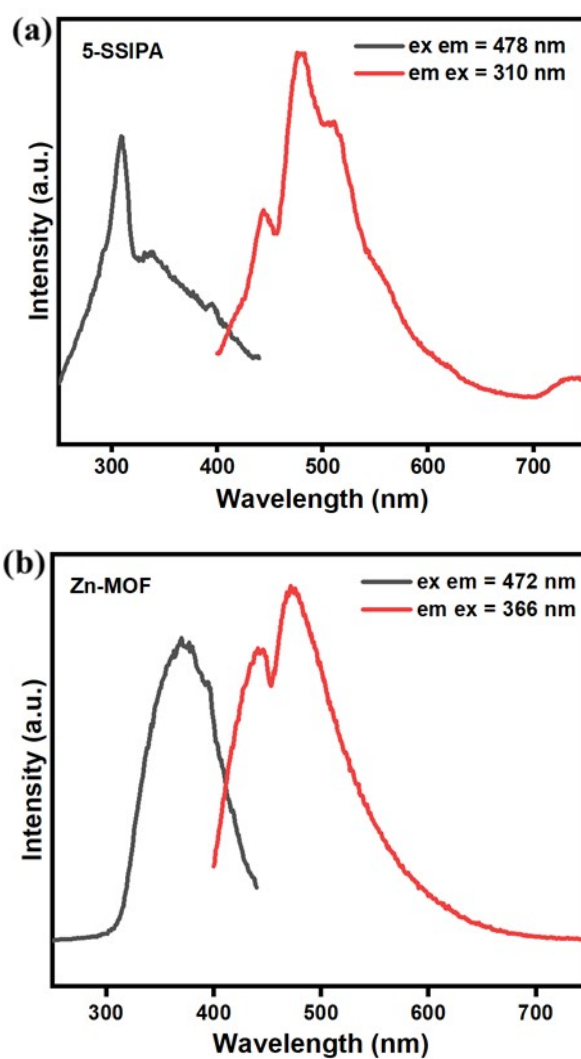

**Fig. S6** The fluorescence excitation and emission spectra of solid-state (a) 5-SSIPA (b) Zn-MOF at room temperature.

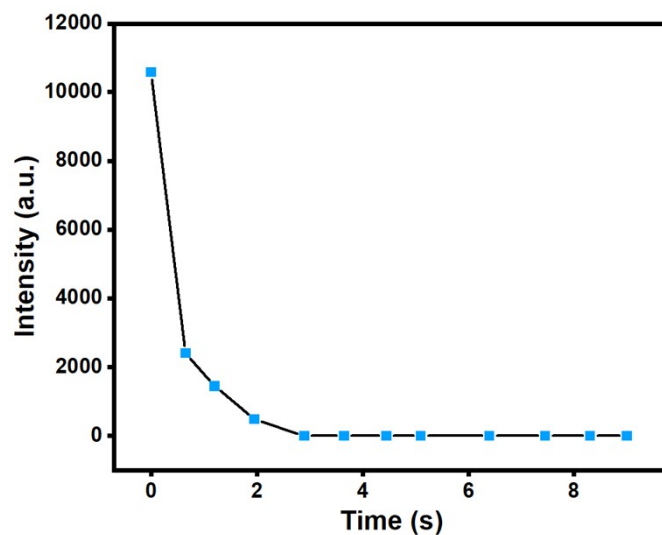

**Fig. S7** Time dependence of emission intensities at 617 nm of Eu@Zn-MOF solution with the addition of rotenone (10 mM).

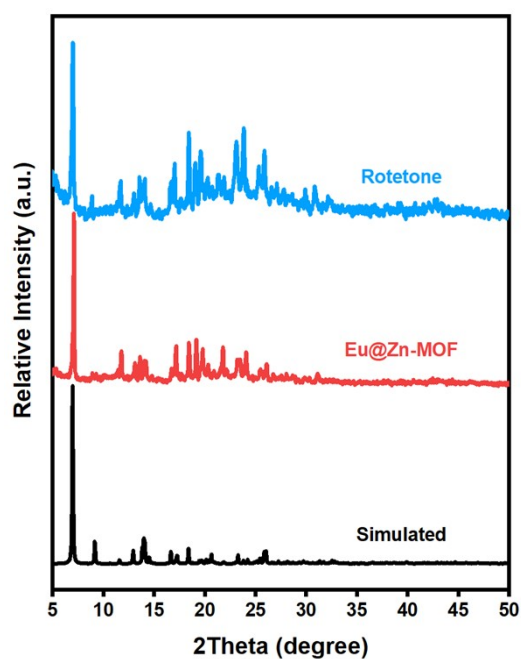

**Fig. S8** The PXRD patterns of Eu@Zn-MOF before and after immersing into rotenone suspension (10 mM).

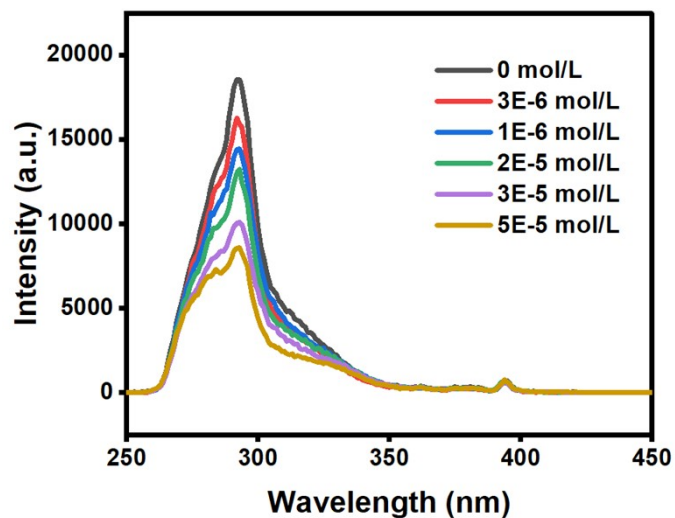

**Fig. S9** The fluorescence excitation spectra of Eu@Zn-MOF solutions under different concentrations of rotenone ( $0-5 \times 10^{-5}$  mol/L).

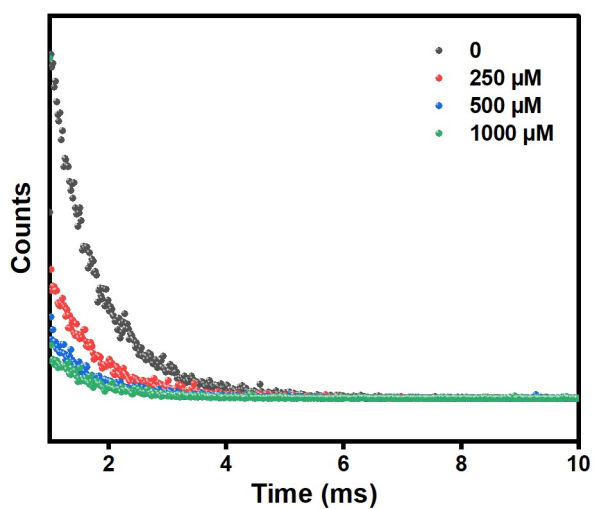

**Fig. S10** Emission decay profiles of Eu@Zn-MOF suspensions under different concentrations of rotenone.

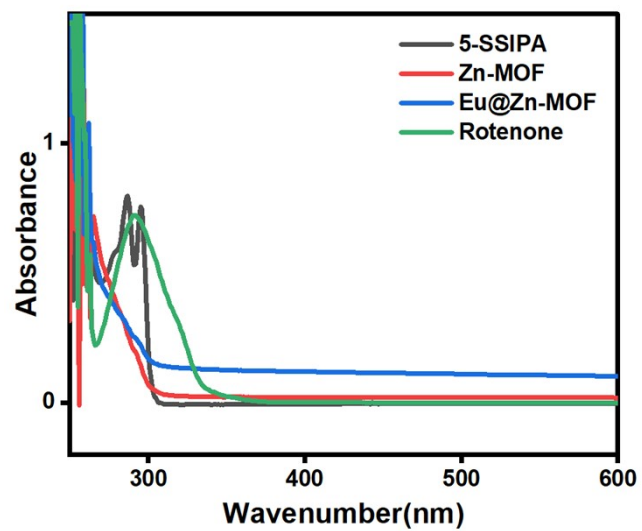

**Fig. S11** The UV-vis spectra of the ligand 5-SSIPa, Zn-MOF, Eu@Zn-MOF and rotenone solutions.

**Table S1** Fluorescence lifetimes of Eu@Zn-MOF in different concentrations of rotenone.

| Concentration ( $\mu\text{M}$ ) | $\tau$ ( $\mu\text{s}$ ) |
|---------------------------------|--------------------------|
| 0                               | 831.74                   |
| 250                             | 810.31                   |
| 500                             | 763.92                   |
| 1000                            | 759.32                   |

The detection limit (LOD) of Eu@Zn-MOF towards rotenone can be calculated by the following equation:

$$\text{LOD} = 3\sigma / k$$

where  $\sigma$  is the standard deviation of luminescent intensity for 10 replicating fluorescence measurements of blank Eu@Zn-MOF solution,  $k$  is the slope of the linear fit of the concentration-dependent luminescence intensity curve monitored at 617 nm.
